# Supplementary material for: Synthetic Ligands of Cannabinoid Receptors Affect Dauer Formation in the Nematode Caenorhabditis elegans
Source: G3 (Bethesda). 2016 Apr 13;6(6):1695–705. doi: 10.1534/g3.116.026997 (PMC4889665; doi:10.1534/g3.116.026997)
Supplement: Supplemental Material [file supp_g3.116.026997_File_S1.xls]

## Sheet: Figure 1
	Figure 1: The cannabinoid receptor antagonist AM251 suppresses dauer formation
	Figure 1B																		Key
																			%D - pecent dauer animals
	Temp: 25oC		AM251																% ND - percent non-dauer animals
			0 µM		1 µM		2.5 µM		5 µM		10 µM		25 µM		50 µM				n - total number of animals scored
			%ND	n	%ND	n	%ND	n	%ND	n	%ND	n	%ND	n	%ND	n			SD - standard deviation
		Rep 1	1.44928	69	5.88235	34	59.7701	87	86.4583	96	89.6104	77	96.0526	76	92.4051	79
		Rep 2	1.88679	53	6.66667	45	3.92157	51	42.1875	64	85.4167	48	81.8182	66	70.6897	58
		Rep 3	14.8649	74	45.9016	61	92	75	86.8852	61	95.082	61	90.566	53	89.7959	49
		Average	6.06698		19.4836		51.8972		71.8437		90.0363		89.479		84.2969
		SD	7.62233		22.8821		44.5639		25.6839		4.84671		7.17922		11.8562
	Figure 1C & D
	Temp: 25oC		DMSO		5 µM AM251		DMSO to AM251								AM251 to DMSO
			72 h		72 h		12 h		18 h		24 h		30 h		12 h		18 h		24 h		30 h
			%ND	n	%ND	n	%ND	n	%ND	n	%ND	n	%ND	n	%ND	n	%ND	n	%ND	n	%ND	n
		Rep 1	0	177	93.2642	193	87.9518	83	90.9091	88	0	82	0	101	3.2967	91	4.65116	86	96.2963	81	70.2128	94
		Rep 2	0	216	85.7143	210	82.7273	110	61.7886	123	0	75	0	88	4.0404	99	6.25	96	96.2963	81	80.4878	82
		Rep 3	0	236	94.8598	214	92.9293	99	86.4583	96	0	77	0	73	1.38889	72	9.09091	88	87.2093	86	87.6712	73
		Average	0		91.2794		87.8695		79.7187		0		0		2.90867		6.66402		93.2673		79.4573
		SD	0		4.88516		5.10151		15.6865		0		0		1.36769		2.24864		5.24638		8.77474

## Sheet: Figure 2
	Figure 2: AM251 activity is augmented by glucose supplementation
	Figure 2A
	Temp: 25oC		0 mM D-Glucose												5 mM D-Glucose												100 mM D-Glucose
			0 µM AM251		0.25 µM AM251		0.5 µM AM251		1 µM AM251		2.5 µM AM251		5 µM AM251		0 µM AM251		0.25 µM AM251		0.5 µM AM251		1 µM AM251		2.5 µM AM251		5 µM AM251		0 µM AM251		0.25 µM AM251		0.5 µM AM251		1 µM AM251		2.5 µM AM251		5 µM AM251
			%ND	n	%ND	n	%ND	n	%ND	n	%ND	n	%ND	n	%ND	n	%ND	n	%ND	n	%ND	n	%ND	n	%ND	n	%ND	n	%ND	n	%ND	n	%ND	n	%ND	n	%ND	n
	Rep 1	Trial 1	0	37	0	36	0	40	0	34	59.375	32	76.7442	43	0	66	1.92308	52	88.5714	70	90.3846	52	100	51	100	46	6.81818	44	87.234	47	100	41	100	45	96.2963	54	100	44
		Trial 2	0	40	0	31	0	35	0	46	55	60	84.3137	51	0	44	9.30233	43	84.6154	39	91.1111	45	98	50	100	56	2.32558	43	90	40	100	40	97.6744	43	97.8261	46	96.1538	52
		Trial 3	1.72414	58	2.77778	36	2.5	40	6.81818	44	44.4444	45	89.7959	49	2.32558	43	3.0303	33	53.8462	39	92.5	40	95.4545	44	96.7213	61	9.30233	43	95.4545	44	100	40	100	46	98.0392	51	100	19
		Trial 4	0	33	0	48	0	47	7.31707	41	50	52	87.5	40	0	53	20.5128	39	83.871	62	91.8367	49	95.8333	48	100	37	5	40	91.1765	34	93.75	32	100	42	95.4545	44	95.122	41
		Trial 5	0	38	2	50	0	52	2.7027	37	39.0244	41	77.5	40	2.17391	46	11.5385	26	78.3784	37	90	30	95.4545	44	97.2222	36	9.09091	44	87.1795	39	100	40	96.9697	33	92.5	40	92.6829	41
	Rep 2	Trial 6	0	65	3.63636	55	7.31707	41	21.7391	46	30.3571	56	47.5	40	0	66	48.2759	58	58.1395	43	89.1892	37	91.0714	56	97.561	41	12.1212	33	97.9592	49	98.0392	51	91.4286	35	93.1818	44	93.6508	63
		Trial 7	0	53	1.66667	60	0	40	6.66667	45	22.6415	53	56.8627	51	0	46	42.3077	52	60	40	35.8491	53	90	50	93.1818	44	10	40	93.75	48	97.7273	44	97.1429	35	90.2439	41	95.4545	44
		Trial 8	0	54	0	47	0	53	6.45161	31	57.1429	42	43.9024	41	3.0303	33	58.1395	43	60.9756	41	92.3077	39	97.9167	48	97.7273	44	8.10811	37	96.7213	61	98.0769	52	95.6522	46	98.2759	58	93.617	47
		Trial 9	0	34	0	44	3.63636	55	6.97674	43	45	40	50	44	0	35	59.6154	52	65.9091	44	96.4912	57	97.8261	46	96.4286	56	8.47458	59	93.4783	46	95.6522	46	95.7447	47	92.3077	39	92.5	40
		Trial 10	0	54	2.08333	48	0	62	5.40541	37	40.4255	47	56.5217	46	0	23	68.1818	44	75	48	97.8723	47	98.1132	53	97.6744	43	9.09091	44	95	40	97.7273	44	90.4762	42	95.7447	47	88.3721	43
	Rep 3	Trial 11	0	23	0	28	0	29	0	36	38.4615	26	82.7586	29	0	27	11.4286	35	33.3333	21	51.2821	39	92.3077	52	97.7273	44	20	30	94.5946	37	100	33	100	44	97.2973	37	97.561	41
		Trial 12	0	28	0	45	0	27	3.57143	28	44.1176	34	80	25	2.17391	46	32	25	36	25	76.4706	34	93.3333	45	100	42	14.7059	34	94.4444	36	100	35	100	41	100	37	96.9697	33
		Trial 13	0	25	0	27	0	33	6.06061	33	25	28	82.8571	35	2.5	40	40	30	24.3243	37	83.3333	36	91.4894	47	100	54	22.2222	36	92.3077	39	97.3684	38	100	31	95.2381	42	97.1429	35
		Trial 14	0	33	0	31	0	32	0	27	27.2727	33	82.5	40	0	33	36.8421	38	38.0952	42	76.7442	43	94.7368	38	100	42	25.7143	35	91.6667	24	100	43	100	45	97.619	42	94.4444	36
		Trial 15	0	40	0	24	2.94118	34	12	25	39.5349	43	69.5652	46	3.7037	27	36	25	39.1304	46	78.125	32	93.75	48	100	32	25	24	92	50	100	24	100	53	100	44	93.0233	43
		Average	0.114943		0.810943		1.09297		5.71397		41.1865		71.2214		1.06049		31.9399		58.6793		82.2331		95.0191		98.2829		12.5316		92.8644		98.5561		97.6726		96.0016		95.113
		SD	0.44517		1.25905		2.13381		5.6545		11.4013		15.8305		1.39234		21.4849		20.8414		17.3037		2.99648		1.98514		7.33824		3.12042		1.9178		3.19245		2.89045		3.04594
	Figure 2B
	Temp 25oC		0 mM L-Glucose												5 mM L-Glucose												100 mM L-Glucose
			0 µM AM251		0.25 µM AM251		0.5 µM AM251		1 µM AM251		2.5 µM AM251		5 µM AM251		0 µM AM251		0.25 µM AM251		0.5 µM AM251		1 µM AM251		2.5 µM AM251		5 µM AM251		0 µM AM251		0.25 µM AM251		0.5 µM AM251		1 µM AM251		2.5 µM AM251		5 µM AM251
			%ND	n	%ND	n	%ND	n	%ND	n	%ND	n	%ND	n	%ND	n	%ND	n	%ND	n	%ND	n	%ND	n	%ND	n	%ND	n	%ND	n	%ND	n	%ND	n	%ND	n	%ND	n
	Rep 1	Trial 1	0	51	0	43	0	44	0	34	11.3636	44	54.6875	64	0	57	0	64	0	47	0	46	6.97674	43	45	40	0	48	4.08163	49	0	53	3.84615	52	7.5	40	70.9091	55
		Trial 2	0	45	0	30	0	36	9.09091	44	53.5714	56	54.902	51	0	30	0	41	2.27273	44	2.43902	41	35.5932	59	56.1404	57	0	52	2.17391	46	0	48	6.52174	46	33.9286	56	97.7273	44
	Rep 2	Trial 3	0	46	3.33333	60	0	50	0	53	25	64	60.2941	68	0	46	0	61	0	40	0	46	38.0952	84	60	100	6	50	3.57143	56	0	48	4.54545	66	57.5342	73	90	60
		Trial 4	0	69	0	45	0	56	0	43	36.0656	61	81.25	64	0	52	1.96078	51	0	44	2.04082	49	48.2759	58	72.7273	77	4.65116	43	1.69492	59	5.35714	56	5.7971	69	24.5902	61	90.1639	61
		Average	0		0.833333		0		2.27273		31.5002		62.7834		0		0.490196		0.568182		1.11996		32.2353		58.4669		2.66279		2.88047		1.33929		5.17761		30.8882		87.2001
		SD	0		1.66667		0		4.54545		17.8486		12.5814		0		0.980392		1.13636		1.3034		17.7098		11.4379		3.12365		1.12916		2.67857		1.20594		20.8641		11.4432
	Figure 2C
	Temp 25oC		daf-2(e1368)												daf-2(e1368);ogt-1(ok430)
			0 µM AM251		0.25 µM AM251		0.5 µM AM251		1 µM AM251		2.5 µM AM251		5 µM AM251		0 µM AM251		0.25 µM AM251		0.5 µM AM251		1 µM AM251		2.5 µM AM251		5 µM AM251
			%ND	n	%ND	n	%ND	n	%ND	n	%ND	n	%ND	n	%ND	n	%ND	n	%ND	n	%ND	n	%ND	n	%ND	n
	Rep 1	Trial 1	14.4578	83			3.44828	87	56.383	94	96.6387	119	100	91	31.1688	77			43.3333	90	55.814	86	100	76	100	71
	Rep 2	Trial 2	36.0656	61	20	50	28	50	61.0169	59	100	47	100	43	16.6667	54	6	50	10.6061	66	39.1892	74	88.7324	71	94.5205	73
	Rep 3	Trial 3	8.21918	73	0	53	1.44928	69	11.6883	77	88.3333	60	100	69	13.1148	61	13.2353	68	15.8537	82	39.1304	69	90.9091	66	97.5	40
	Rep 4	Trial 4	0	50	0	58	0	43	0	36	69.7674	43	97.4359	39	6.89655	29	2.27273	44	2.43902	41	31.7073	41	83.3333	42	92.6829	41
	Rep 5	Trial 5	0	48	2.5641	39	2.08333	48	33.871	62	97.6744	43	100	40	11.7647	34	11.1111	36	8.33333	60	15.3846	52	87.8049	41	97.9167	48
	Rep 6	Trial 6	0	40	0	42	2.43902	41	10.8108	37	32	50	92.3077	39	5	40	2.77778	36	2.5641	39	19.3548	31	80	45	86.0465	43
		Average	9.79043		4.51282		6.23665		28.9617		80.7356		98.2906		14.1019		7.07938		13.8549		33.4301		88.4633		94.7778
		SD	14.1576		8.7285		10.7229		25.5741		26.3216		3.10528		9.37077		4.92247		15.309		14.788		6.89242		5.00448

## Sheet: Figure 3
	Figure 3: AM251 is inhibited by neuronal AMPK activity
	Figure 3A
	Temp: 26.5oC		daf-2(e1368)								daf-2(e1368); aak-2(ok524)
			0 µM AM251		1 µM AM251		2.5 µM AM251		5 µM AM251		0 µM AM251		1 µM AM251		2.5 µM AM251		5 µM AM251
			%ND	n	%ND	n	%ND	n	%ND	n	%ND	n	%ND	n	%ND	n	%ND	n
	Rep 1	Trial 1	0	51	0	36	0	49	9.43396	53	6.81818	44	28.8889	45	43.5897	39	69.0476	42
		Trial 2	0	33	0	48	0	57	13.6364	44	10.2041	49	27.7778	54	42.8571	42	74.4681	47
		Trial 3	0	57	0	50	0	62	11.3208	53	5	40	29.2683	41	46.6667	30	80.4878	41
	Rep 2	Trial 4	0	39	0	37	6.66667	30	32.6087	46	25.7143	35	36.3636	55	70	50	97.9167	48
		Trial 5	0	36	2.85714	35	19.2982	57	45.9459	37	7.69231	52	40.9091	44	64	50	100	61
		Trial 6	0	42	0	35	10.2564	39	28.5714	28	12.1951	41	43.75	48	69.5652	46	100	57
	Rep 3	Trial 7	0	39	0	56	0	48	6.25	48	10.6383	47	74.4681	47	91.4894	47	97.9592	49
		Trial 8	0	62	0	47	2.17391	46	13.0435	46	19.5122	41	81.1321	53	90.7407	54	95	40
		Trial 9	0	56	0	45	0	69	13.0435	69	6.12245	49	80	50	91.6667	36	98.0392	51
		Average	0		0.31746		4.26614		19.3171		11.5441		49.1731		67.8417		90.3243
		SD	0		0.952381		6.73598		13.2983		6.86217		22.7451		20.4156		12.1729
	Figure 3B
	Temp: 25oC		daf-2(e1368)								daf-2(e1368); uthIs248
			0 µM AM251		1 µM AM251		2.5 µM AM251		5 µM AM251		0 µM AM251		1 µM AM251		2.5 µM AM251		5 µM AM251
			%ND	n	%ND	n	%ND	n	%ND	n	%ND	n	%ND	n	%ND	n	%ND	n
	Rep 1	Trial 1	0	31	10	40	52.7778	36	84.8485	33	0	42	0	29	40	30	47.0588	34
		Trial 2	0	33	11.7647	34	62.1622	37	95	40	0	27	2.85714	35	30.303	33	36.3636	33
		Trial 3	0	35	6.45161	31	63.1579	38	93.9394	33	3.33333	30	6.66667	30	37.8378	37	46.875	32
	Rep 2	Trial 4	0	46	6.25	48	22.2222	36	68.2927	41	0	36	0	33	4.65116	43	22.2222	36
		Trial 5	0	47	0	52	20	25	46.6667	45	0	32	0	43	4.25532	47	13.8889	36
		Trial 6	0	49	3.27869	61	18	50	46	50	2.08333	48	3.92157	51	1.96078	51	20	45
	Rep 3	Trial 7	0	53	33.3333	54	100	45	100	57	2	50	22.7273	44	20.7547	53	50	52
		Trial 8	2.5	40	46.1538	65	91.4894	47	100	55	3.38983	59	21.519	79	33.9623	53	62.963	54
		Trial 9	5.08475	59	28.9474	38	81.1321	53	98.4615	65	1.78571	56	9.30233	43	29.6296	54	60.4167	48
	Rep 4	Trial 10	0	43	0	45	32.1429	28	48.7179	39	0	36	0	35	6.89655	29	16.129	31
		Trial 11	0	38	0	42	14.6341	41	22.8571	35	3.22581	31	0	34	4.34783	46	7.5	40
		Trial 12	0	49	3.125	32	19.0476	42	47.2222	36	0	28	0	30	0	44	20.8333	48
		Average	0.632062		12.442		48.0638		71.0005		1.31817		5.58283		17.8833		33.6875
		SD	1.57568		15.259		31.1851		27.5255		1.46741		8.31264		15.6217		19.2296
	Figure 3C
	Temp: 25oC		daf-2(e1368)				daf-2(e1368); wbmEx66				daf-2(e1368); wbmEx67				daf-2(e1368); wbmEx68
			0 µM AM251		5 µM AM251		0 µM AM251		5 µM AM251		0 µM AM251		5 µM AM251		0 µM AM251		5 µM AM251
			%ND	n	%ND	n	%ND	n	%ND	n	%ND	n	%ND	n	%ND	n	%ND	n
	Rep1	Trial 1	3.57143	56	70.2703	74	1.81818	55	20.5479	73	1.75439	57	53.5211	71	16	25	85.1852	54
		Trial 2	12.5	64	74.0741	81	0	68	11.3208	53	7.46269	67	21.6667	60	6.66667	30	94.1176	51
	Rep 2	Trial 3	1.35135	74	55	60	0	52	11.1111	54	8.33333	60	92	25	11.11	27	90.24	41
		Trial 4	5.26316	57	50.7692	65	5.45455	55	7.14286	56	6.06061	33	68.8889	45	2.7027	37	90.9091	22
	Rep 3	Trial 5	0	60	96.1538	52	0	108	17.0732	82	2.15054	93	80.2083	96	2.66667	75	85.3659	82
	Rep 4	Trial 6	2	50	70.2128	47	1.31579	76	13.3333	60	0	59	61.194	67	8.62069	58	89.4737	95
	Rep 5	Trial 7	3.50877	57	71.2121	66	0	65	7.54717	53	0	90	30.5556	72	7.89474	76	78.6408	103
		Average	4.02782		69.6703		1.22693		12.5823		3.68022		58.2907		7.95		87.7
		SD	4.10854		14.6985		2.01046		4.87988		3.52991		25.3993		4.7		5.08

## Sheet: Figure 4
	Figure 4: AM251 requires both TGF-β and insulin secretion from the ASI neuron
	Figure 4A
	Temp: 25oC		CON - daf-2(e1368)				ASI(-) - daf-2(e1368);jluEx122
			0 µM AM251		5 µM AM251		0 µM AM251		5 µM AM251
			%ND	n	%ND	n	%ND	n	%ND	n
	Rep1	Trial 1	0	46	97.8723	47	0	14	33.3333	18
		Trial 2	0	52	100	35	8.33333	12	10.5263	19
		Trial 3	4	25	91.4286	35	0	15	26.3158	19
	Rep 2	Trial 4	0	45	94.6429	56	2.77778	36	7.89474	38
		Trial 5	0	42	96.1538	52	0	47	13.7931	29
		Trial 6	0	39	100	52	0	27	21.1538	52
		Average	0.666667		96.6829		1.85185		18.8362
		SD	1.63299		3.33079		3.36406		9.85581
	Figure 4B
	Temp: 25oC		CON - daf-2(e1368); jxEx18				ASJ(-) - daf-2(e1368); jxEx100
			0 µM AM251		5 µM AM251		0 µM AM251		5 µM AM251
			%ND	n	%ND	n	%ND	n	%ND	n
	Rep1	Trial 1	71.0526	38	100	53	6.45161	31	100	31
		Trial 2	67.5676	37	100	40	25	44	100	32
		Trial 3	67.4419	43	100	35	16.6667	30	100	29
	Rep 2	Trial 4	55.5556	45	93.5065	77	20	35	85.3659	41
		Trial 5	57.1429	28	89.6552	58	23.8095	42	84.6154	26
		Trial 6	66.6667	42	96.7742	62	16.6667	12	95.2381	21
		Average	64.2379		96.656		18.0991		94.2032
		SD	6.31529		4.30098		6.68749		7.37434
	Figure 4C
	Temp: 25oC		daf-2(e1368)				daf-7(e1372)				daf-4(e1364)
			0 µM AM251		5 µM AM251		0 µM AM251		5 µM AM251		0 µM AM251		5 µM AM251
			%ND	n	%ND	n	%ND	n	%ND	n	%ND	n	%ND	n
	Rep1	Trial 1	0	56	89.3939	66	0	26	0	30	0	18	0	32
		Trial 2	1.16279	86	86.8421	76	0	38	0	46	0	7	0	30
		Trial 3	0	63	91.5254	59	0	54	0	32	0	10	0	26
	Rep 2	Trial 4	5.17241	58	95.9184	49	0	70	0	47	0	36	0	49
		Trial 5	0	64	91.1765	68	0	47	0	48	0	22	0	35
		Trial 6	8.19672	61	88.1579	76	0	72	0	47	0	33	0	24
	Rep 3	Trial 7	3.08	65	90.16	61	0	28	0	40	0	33	0	38
		Trial 8	1.97	51	89.47	57	0	33	0	38	0	26	0	33
		Trial 9	2.17	46	94.11	51	0	11	0	43	0	12	0	30
		Average	2.41688		90.7505		0		0		0		0
		SD	2.75673		2.84167		0		0		0		0
	Figure 4D
	Temp: 25oC		daf-2(e1371)								ins-6(tm2416); daf-2(e1371)								daf-2(e1371); daf-28(tm2308)
			0 µM AM251		1 µM AM251		2.5 µM AM251		5 µM AM251		0 µM AM251		1 µM AM251		2.5 µM AM251		5 µM AM251		0 µM AM251		1 µM AM251		2.5 µM AM251		5 µM AM251
			%ND	n	%ND	n	%ND	n	%ND	n	%ND	n	%ND	n	%ND	n	%ND	n	%ND	n	%ND	n	%ND	n	%ND	n
	Rep 1	Trial 1	1.75439	114	50	54	100	91	98.9011	91	0	73	35.9551	89	98.0583	103	94.3396	106	0	108	11.3636	132	29.0541	148	41.5254	118
		Trial 2	3.37079	89	62.963	81	98.8506	87	100	127	0.862069	116	28.7879	66	97.9798	99	93.6508	126	0	106	13.8365	159	37.0968	124	54.4643	112
		Trial 3	2.22222	45	22.3529	85	100	113	100	118	0	95	38.4615	39	64.7059	85	90.2439	123	0	127	10.6061	66	27.1186	118	49.3151	73
	Rep 2	Trial 4	0	40	26.4706	34	92.0635	63	100	49	0	34	16.6667	36	93.1818	44	75	32	0	33	0	34	9.09091	44	29.5455	44
		Trial 5	8.33333	48	28.3019	53	92.7273	55	100	56	0	41	55.5556	54	51.8519	54	75.6098	41	0	22	0	23	9.61538	52	32.2581	62
		Trial 6	8.77193	57	18	50	90.6977	43	100	41	0	38	28.5714	42	77.7778	72	81.5789	38	0	27	0	32	15.0943	53	37.2093	43
	Rep 3	Trial 7	7.57576	66	38	50	100	56	100	70	0	55	30.9091	55	64.2857	56	94.4444	54	0	49	9.43396	53	28.2609	46	60.3774	53
		Trial 8	2.04082	49	25.9259	54	98.0392	51	92.8571	56	0	63	39.3443	61	80.4348	46	98.2456	57	0	53	7.54717	53	15.2174	46	69.2308	52
		Trial 9	6.66667	60	65.2778	72	98.4127	63	100	62	0	42	52.381	42	82.6087	46	94.6429	56	0	69	5.35714	56	17.0213	47	46	50
		Average	4.52621		37.4769		96.7545		99.0842		0.0957854		36.2925		78.9872		88.6395		0		6.46049		20.8411		46.6584
		SD	3.30514		17.7706		3.79642		2.36328		0.287356		12.1147		16.198		8.859		0		5.38616		9.80743		13.1434
	Figure 4E
	Temp: 26.5oC		ins-6(tm2416); daf-28(tm2308)									Temp: 27oC		ins-6(tm2416); daf-28(tm2308)
			0 µM AM251		1 µM AM251		2.5 µM AM251		5 µM AM251					0 µM AM251		1 µM AM251		2.5 µM AM251		5 µM AM251
			%ND	n	%ND	n	%ND	n	%ND	n				%ND	n	%ND	n	%ND	n	%ND	n
	Rep 1	Trial 1	63	100	70.5882	68	65.9794	97	67.4699	83		Rep 1	Trial 1	8.33333	36	8.57143	35	7.54717	53	3.22581	31
		Trial 2	70.7692	65	73.2394	71	64.4444	90	59.5238	84			Trial 2	5.40541	37	0	25	9.09091	55	0	26
		Trial 3	71.0145	69	64.0625	64	80.303	66	71.2644	87			Trial 3	2.5	40	0	27	2.77778	36	0	25
		Trial 4	69.3333	75	67.7419	62	58.1818	55	65.625	64			Trial 4	0	40	2.43902	41	0	49	7.40741	27
	Rep 2	Trial 5	75.8621	58	60	55	77.5	80	72.5806	62			Trial 5	2.63158	38	3.84615	52	11.4286	35	3.57143	28
		Trial 6	83.9286	56	84.6154	52	81.5385	65	60.7843	51		Rep 2	Trial 6	0	45	0	57	4.54545	44	2.77778	36
		Trial 7	85	60	75.7143	70	68.254	63	61.9048	63			Trial 7	2.17391	46	4.65116	43	1.81818	55	1.96078	51
		Trial 8	70.1754	57	86.8852	61	65.3333	75	69.697	66			Trial 8	0	30	0	47	2.5	40	0	38
	Rep 3	Trial 9	71.4286	84	65.6716	67	64.1509	53	50	46			Trial 9	2.04082	49	0	39	2.27273	44	4.7619	42
		Trial 10	66.3043	92	72.7273	66	58.8235	68	76.6667	60			Trial 10	2.43902	41	2.5	40	0	54	0	55
		Trial 11	75	44	64.2857	56	59.2593	54	80.303	66		Rep 3	Trial 11	18.4211	38	9.67742	31	6.38298	47	7.69231	39
		Trial 12	73.8636	88	63.2353	68	65.0794	63	63.4921	63			Trial 12	7.89474	38	9.30233	43	9.52381	42	12.1951	41
		Average	72.9733		70.7306		67.404		66.6093				Trial 13	15	40	5	40	8.33333	60	18.9189	37
		SD	6.42442		8.42479		8.11784		8.25223				Trial 14	13.8889	36	2.5	40	7.89474	38	15.7895	38
													Trial 15	11.9048	42	9.7561	41	10	50	15	40
													Average	6.17557		3.88291		5.60771		6.22006
													SD	6.07042		3.80373		3.82506		6.39227
	Figure 4F
	Temp 27oC		unc-31(e928)
			0 µM AM251		1 µM AM251		2.5 µM AM251		5 µM AM251
			%ND	n	%ND	n	%ND	n	%ND	n
	Rep 1	Trial 1	0	45	3.63636	55	6.66667	45	16.0714	56
		Trial 2	12.5	48	7.14286	42	5.66038	53	6	50
		Trial 3	3.125	64	6.25	48	10.4167	48	13.4615	52
	Rep 2	Trial 4	0	53	0	47	0	46	0	41
		Trial 5	0	54	0	44	0	39	0	49
		Trial 6	2.08333	48	0	50	2.63158	38	0	47
	Rep 3	Trial 7	0	70	0	73	0	57	0	69
		Trial 8	0	75	0	54	3.27869	61	4.91803	61
		Trial 9	0	43	0	56	0	53	7.14286	70
	Rep 4	Trial 10	0	60	6.12245	49	1.72414	58	0	50
		Trial 11	0	41	0	57	0	49	2.5641	39
		Trial 12	0	44	2.32558	43	0	54	2.7027	37
		Average	1.47569		2.1231		2.53151		4.40506
		SD	3.62095		2.89369		3.42101		5.49162

## Sheet: Figure 5
	Figure 5: AM251 functions upstream of gpa-3 and ser-5 to suppress dauer formation.
	Figure 5A
	Temp: 25oC		daf-2(e1368)*				daf-11(m47)
			0 µM AM251		5 µM AM251		0 µM AM251		5 µM AM251
			%ND	n	%ND	n	%ND	n	%ND	n
	Rep1	Trial 1	0	56	89.3939	66	0	46	6	50
		Trial 2	1.16279	86	86.8421	76	0	46	2.17391	46
		Trial 3	0	63	91.5254	59	0	65	1.63934	61
	Rep 2	Trial 4	5.17241	58	95.9184	49	22.2222	45	9.09091	55
		Trial 5	0	64	91.1765	68	22.3881	67	0	51
		Trial 6	8.19672	61	88.1579	76	24	50	5.17241	58
	Rep 3	Trial 7	3.08	65	90.16	61	9.61538	52	9.83607	61
		Trial 8	1.97	51	89.47	57	7.14286	56	11.7647	68
		Trial 9	2.17	46	94.11	51	16.6667	60	7.54717	53
		Average	2.41688		90.7505		11.3372		5.91384
		SD	2.75673		2.84167		10.2195		4.03372
			*same data in Figure 4C
	Figure 5B
	Temp: 25oC		daf-2(e1368)				daf-2(e1368);gpa-1(pk15)				daf-2(e1368);gpa-3(pk35)				daf-2(e1368);gpa-4(pk381)				daf-2(e1368);gpa-5(pk376)				daf-2(e1368);gpa-6(pk480)				daf-2(e1368);gpa-10(pk362)				gpa-14(pk342);daf-2(e1368)
			0 µM AM251		5 µM AM251		0 µM AM251		5 µM AM251		0 µM AM251		5 µM AM251		0 µM AM251		5 µM AM251		0 µM AM251		5 µM AM251		0 µM AM251		5 µM AM251		0 µM AM251		5 µM AM251		0 µM AM251		5 µM AM251
			%ND	n	%ND	n	%ND	n	%ND	n	%ND	n	%ND	n	%ND	n	%ND	n	%ND	n	%ND	n	%ND	n	%ND	n	%ND	n	%ND	n	%ND	n	%ND	n
	Rep1	Trial 1	0	52	100	51	0	72	100	86	0	60	29.8246	57	2.12766	47	98.6301	73									11.1111	36	100	49	1.40845	71	100	79
		Trial 2	3.57143	28	100	56	1.42857	70	100	74	0	64	36.6667	60	1.92308	52	100	53									0	57	100	35	1.81818	55	100	59
		Trial 3	0	46	100	56	0	75	95.5556	90	0	63	39.0244	41	2.27273	44	97.2222	72									6.12245	49	100	44	0	55	97.7778	45
	Rep 2	Trial 4	0	45	100	52	0	61	100	55	0	37	35.5556	45	0	50	100	41	2	50	100	42	3.33333	60	98	50	0	49	100	38	0	50	100	45
		Trial 5	0	35	100	60	0	62	100	46	0	44	45.8333	48	0	50	100	40	4.44444	45	100	49	0	50	96.0784	51	0	56	96.2963	54	0	53	96.7742	31
		Trial 6	0	52	98.3871	62	0	57	100	51	0	34	49.0196	51	0	43	100	57	0	43	98.0769	52	0	50	100	55	2.27273	44	100	42	0	48	100	52
	Rep 3	Trial 7	0	32	97.1429	35	16.3265	49	94.3396	53	0	59	60	30	0	28	92.3077	39	2.17391	46	97.619	42	0	28	92.3077	39	13.3333	15	91.1111	45	7.69231	39	96.9697	33
		Trial 8	0	30	100	27	2.27273	44	98.1818	55	0	47	56.5217	46	0	37	97.0588	34	3.84615	52	100	64	0	37	97.0588	34	23.0769	26	100	48	6.66667	30	100	42
		Trial 9	0	37	100	26	5.12821	39	100	57	0	27	11.1111	36	0	37	100	62	0	65	100	66	0	37	100	62	11.8644	59	100	36	20	35	98.2143	56
		Average	0.396825		99.5033		2.79511		98.6752		0		40.3952		0.702607		98.3577		2.07742		99.2827		0.555556		97.2408		7.53122		98.6008		4.17618		98.8596
		SD	1.19048		1.03348		5.35894		2.21651		0		14.8192		1.05756		2.57728		1.86429		1.12069		1.36083		2.88175		7.95864		3.06412		6.6327		1.41465
	Figure 5C
	Temp: 25oC		daf-2(e1368)				ser-5(ok3087);daf-2(e1368)				tph-1(mg280);daf-2(e1368)
			0 µM AM251		5 µM AM251		0 µM AM251		5 µM AM251		0 µM AM251		5 µM AM251
			%ND	n	%ND	n	%ND	n	%ND	n	%ND	n	%ND	n
	Rep1	Trial 1	0	52	100	51	0	64	15.5844	77	1.78571	56	100	57
		Trial 2	3.57143	28	100	56	0	67	12.9032	62	3.7037	54	98.7654	81
		Trial 3	0	46	100	56	0	70	15.1515	66	3.27869	61	100	64
	Rep 2	Trial 4	0	45	100	52	0	60	0	55	0	54	100	57
		Trial 5	0	35	100	60	0	59	0	51	1.75439	57	96.6667	60
		Trial 6	0	52	98.3871	62	0	43	0	50	0	60	100	66
	Rep 3	Trial 7	0	32	97.1429	35	0	54	35.1351	37	0	40	100	39
		Trial 8	0	30	100	27	0	44	27.2727	33	25	44	100	35
		Trial 9	0	37	100	26	0	24	17.7778	45	14.2857	21	100	38
		Average	0.396825		99.5033		0		13.7583		5.53425		99.4925
		SD	1.19048		1.03348		0		12.3978		8.54521		1.13561

## Sheet: Figure 6
	Figure 6: Other CB receptor agonists and antagonists influence dauer formation in daf-2 mutants.
	Figure 6A		LH21
			0 µM		2.5 µM		5 µM		10 µM		25 µM		50 µM
			%ND	n	%ND	n	%ND	n	%ND	n	%ND	n	%ND	n
		Rep 1	3.22581	31	13.5135	37	9.09091	44	42.5	40	83.3333	48	87.5	48
		Rep 2	11.5385	26	2.5	40	20	35	32.2581	31	73.6842	38	78.0488	41
		Average	7.38213		8.00676		14.5455		37.379		78.5088		82.7744
		SD	5.87793		7.78773		7.71389		7.24214		6.82296		6.68302
	Figure 6B		AM630
			0 µM		2.5 µM		5 µM		10 µM		25 µM		50 µM
			%ND	n	%ND	n	%ND	n	%ND	n	%ND	n	%ND	n
	Rep 1	Trial 1	0	42	2.12	47	0	20	42.3	26	19.2	26	42.85	28
	Rep 2	Trial 2	6.12	47	11.43	35	16.67	36	20.83	24	82.76	28	74.07	27
	Rep 3	Trial 3	0	34	2.43902	41	2.5641	39	0	46	0	47	28.5714	42
		Trial 4	0	40	3.33333	60	0	63	0	51	31.8182	66	27.5862	29
	Rep 4	Trial 5	21.7391	69	23.2143	56	17.1429	70	36.1111	72	77.7778	63	75.8621	58
		Average	5.57183		8.50733		7.27539		19.8482		42.3112		49.7879
		SD	9.41831		9.07234		8.85557		19.7322		36.4981		23.7733
	Figure 6C		URB447
			0 µM		2.5 µM		5 µM		10 µM		25 µM		50 µM
			%ND	n	%ND	n	%ND	n	%ND	n	%ND	n	%ND	n
	Rep 1	Trial 1	0	35	7.14	28	2.56	39	6.25	16	51.43	35	53.84	26
	Rep 2	Trial 2	5.56	38	8	25	3.7	27	8	27	60.53	38	64.86	37
	Rep 3	Trial 3	3.44828	58	9.67742	62	1.69492	59	5	60	5.35714	56	5.12821	39
		Trial 4	0	43	3.84615	52	0	53	8.33333	36	6.25	48	0	41
	Rep 4	Trial 5	17.0455	88	29.2683	82	19.1176	68	22.8571	70	44.8276	58	37.3333	75
		Average	5.21075		11.5864		5.41451		10.0881		33.6789		32.2323
		SD	7.02838		10.1099		7.77843		7.26477		26.0521		28.8576
	Figure 6D
	Temp: 25oC		0 µM AM251		2.5 µM AM251
			0 µM O-2545		0 µM O-2545		2.5 µM O-2545		5 µM O-2545		10 µM O-2545		25 µM O-2545		50 µM O-2545
			%ND	n	%ND	n	%ND	n	%ND	n	%ND	n	%ND	n	%ND	n
		Rep 1	11.3636	44	64.8148	54	0	54	0	45	0	43	0	47	0	53
		Rep 2	6.52174	46	70	50	0	40	0	33	0	29	0	26	0	38
		Rep 3	29.3103	58	95.7447	47	5.76923	52	0	46	0	43	1.88679	53	0	56
		Average	15.7319		76.8532		1.92308		0		0		0.628931		0
		SD	12.0059		16.5647		3.33087		0		0		1.08934		0
	Figure 6E
			0 µM AM251			2.5 µM AM251
			0 µM GP1a			0 µM GP1a			2.5 µM GP1a			5 µM GP1a			10 µM GP1a			25 µM GP1a			50 µM GP1a
			%ND	%L1/L2D	n	%ND	%L1/L2D	n	%ND	%L1/L2D	n	%ND	%L1/L2D	n	%ND	%L1/L2D	n	%ND	%L1/L2D	n	%ND	%L1/L2D	n
		Rep 1	28.5714	0	49	86.3636	0	44	75.5556	0	45	79.5455	0	44	84.0909	0	44	45.7143	0	35	7.14286	4.7619	42
		Rep 2	35.4839	0	62	85.7143	0	49	90.3226	0	31	96.1538	0	52	93.2203	0	59	35.8209	14.9254	67	30.9524	30.9524	42
		Rep 3	3.84615	0	52	84.4828	0	58	89.3939	0	66	79.5918	4.08163	49	67.3077	3.84615	52	62	16	50	49.0196	25.4902	51
		Average	22.6338	0		85.5202	0		85.0907	0		85.097	1.36054		81.5396	1.28205		47.8451	10.3085		29.0383	20.4015
		SD	16.6336	0		0.955337	0		8.27071	0		9.5755	2.35653		13.1434	2.22058		13.219	8.94354		21.0039	13.8169
	Figure 6F
			0 µM AM251			2.5 µM AM251
			0 µM CP55,940			0 µM CP55,940			2.5 µM CP55,940			5 µM CP55,940			10 µM CP55,940			25 µM CP55,940			50 µM CP55,940
			%ND	%L1/L2D	n	%ND	%L1/L2D	n	%ND	%L1/L2D	n	%ND	%L1/L2D	n	%ND	%L1/L2D	n	%ND	%L1/L2D	n	%ND	%L1/L2D	n
		Rep 1	10	0	40	83.9286	0	56	89.7959	0	49	95.3488	0	43	90.9091	0	44	96.2963	0	54	92.5	0	40
		Rep 2	35.5556	0	45	84.6154	0	39	87.5	0	48	95.8333	0	48	92.8571	0	42	100	0	53	95.5224	4.47761	67
		Rep 3	18.5185	0	54	82.2581	9.67742	62	91.8367	8.16327	49	97.9167	0	48	100	0	47	100	0	43	100	0	36
		Average	21.358	0		83.6007	3.22581		89.7109	2.72109		96.3663	0		94.5887	0		98.7654	0		96.0075	1.49254
		SD	13.0123	0		1.21238	5.58726		2.16962	4.71306		1.36435	0		4.78644	0		2.13833	0		3.77346	2.58515
	Figure 6G
	Temp: 23.6oC		O-2545
			0 µM			2.5 µM			5 µM			10 µM			25 µM			50 µM
			% L1/L2D	%D	n	% L1/L2D	%D	n	% L1/L2D	%D	n	% L1/L2D	%D	n	% L1/L2D	%D	n	% L1/L2D	%D	n
		Rep 1	0	2.08333	48	0	4.7619	42	0	2.27273	44	3.77358	45.283	53	30.3571	48.2143	56	61.7021	25.5319	47
		Rep 2	0	0	44	0	8.82353	34	0	11.1111	27	0	37.3134	67	7.14286	46.4286	56	50	15	40
		Rep 3	0	15.3846	52	0	26.0274	73	0	39.6552	58	0	85.1852	54	0	100	48	12.8205	78.2051	78
		Rep 4	0	17.4603	63	0	23.0769	65	0	19.0476	63	0	90	50	0	90.16	61	27.2727	60.6061	33
		Average	0	8.73207		0	15.6724		0	18.0217		0.943396	64.4454		9.375	71.2007		37.9488	44.8358
		SD	0	8.96091		0	10.4562		0	15.9671		1.88679	26.997		14.3877	27.8741		22.0217	29.5806
	Figure 6H
	Temp: 23.6oC		daf-2(e1368)				srbc-64(tm1946);daf-2(e1368)				daf-2(e1368);srbc-66(tm2943)
			0 µM O-2545		25 µM O-2545		0 µM O-2545		25 µM O-2545		0 µM O-2545		25 µM O-2545
			%D	n	%D	n	%D	n	%D	n	%D	n	%D	n
	Rep1	Trial 1	14.9254	67	25	80	25	80	70	50	21.1111	90	63.7681	69
		Trial 2	6.89655	58	12.5	32	12.5	32	83.6364	55	26.3158	76	75.2577	97
		Trial 3	16.6667	60	38.7097	62	38.7097	62	92.1569	51	21.6216	74	78.8732	71
		Trial 4	27.0833	48	40.8451	71	40.8451	71	92.5926	81	28.0488	82	89.7727	88
	Rep 2	Trial 5	19.0476	42	36.6667	60	30	60	74	50	34.6154	52	66.6667	60
		Trial 6	10.9091	55	40	45	27.8689	61	84.4444	45	33.3333	51	69.3333	75
		Trial 7	18.6441	59	44.6429	56	23.8095	63	82	50	37.7358	53	80.2469	81
		Trial 8	16.2162	74	22.4138	58	34.4828	58	78.8462	52	37.7778	45	90	50
	Rep 3	Trial 9	17.7778	45	33.3333	60	38.4615	52	70	50	23.0769	52	82	50
		Trial 10	19.2308	52	46.6667	75	38.5965	57	70.5882	51	29.4118	51	75	52
		Trial 11	24	50	55.5556	72	30.6122	49	80.3571	56	30.4348	46	74.5098	51
		Trial 12	15.6863	51	54.386	57	28.5714	42	84.7826	46	32.6923	52	66.0377	53
		Average	17.257		37.56		30.7881		80.2837		29.6813		75.9555
		SD	5.29401		12.7634		8.13601		7.92744		5.82966		8.6977
